# Supplementary material for: In Silico Analysis of the Ga3+/Fe3+ Competition for Binding the Iron-Scavenging Siderophores of P. aeruginosa—Implementation of Three Gallium-Based Complexes in the “Trojan Horse” Antibacterial Strategy
Source: MDPI journal article supplement (doi:10.3390/biom14040487), 2024-04-16
Supplement: s1 [file s1]

Article

# In Silico Analysis of the $\text{Ga}^{3+}/\text{Fe}^{3+}$ Competition for Binding the Iron-Scavenging Siderophores of *P. aeruginosa*—Implementation of Three Gallium-Based Complexes in the “Trojan Horse” Antibacterial Strategy

Nikoleta Kircheva <sup>1</sup>, Stefan Dobrev <sup>1</sup>, Vladislava Petkova <sup>1</sup>, Lyubima Yocheva <sup>2</sup>, Silvia Angelova <sup>1,3</sup> and Todor Dudev <sup>2,\*</sup>

<sup>1</sup> Institute of Optical Materials and Technologies “Acad. J. Malinowski”, Bulgarian Academy of Sciences, 1113 Sofia, Bulgaria; nkircheva@iomt.bas.bg (N.K.); sdobrev@iomt.bas.bg (S.D.); vpetkova@iomt.bas.bg (V.P.); sea@iomt.bas.bg (S.A.)

<sup>2</sup> Faculty of Chemistry and Pharmacy, Sofia University “St. Kliment Ohridski”, 1164 Sofia, Bulgaria; lyubima\_d\_dasheva@abv.bg

<sup>3</sup> University of Chemical Technology and Metallurgy, 1756 Sofia, Bulgaria

\* Correspondence: t.dudev@chem.uni-sofia.bg

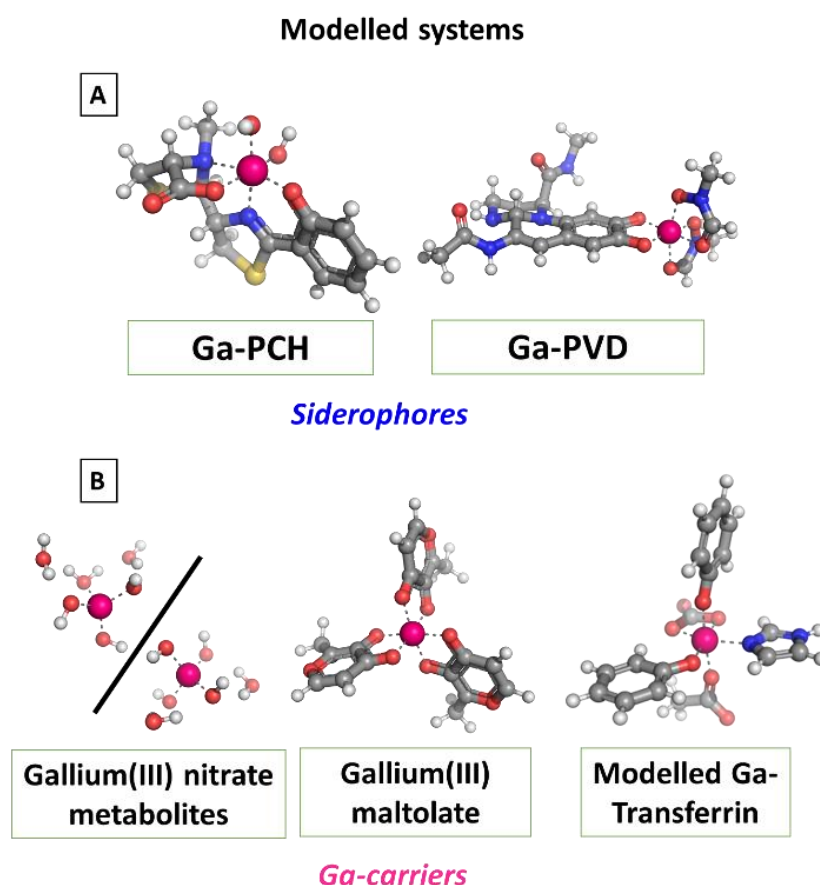

**Figure S1.** (A) B3LYP/6-31+G(3d,p) optimized structures of Ga complex with pyochelin (whole molecule) and pyoverdine (a simplified model); (B) B3LYP/6-31+G(3d,p) optimized structures of gallium(III) nitrate metabolites, gallium(III) maltolate, and a simplified model used for the Ga-transferrin complex.
